# Supplementary material for: Structural evolution analysis and cold-crystallization kinetics of spherical crystals in poly(trimethylene terephthalate) film using Raman spectroscopy
Source: Royal Society of Chemistry journal article supplement (doi:10.1039/c5sm01605c), 2015-01-01
Supplement: c5sm01605c1.pdf [file c5sm01605c1.pdf]

## Supporting Information

### **Structural Evolution Analysis and Cold-Crystallization Kinetics to Spherical Crystal in Poly (trimethylene terephthalate) Film using Raman Spectroscopy**

*Chenglong Hu,<sup>a,b</sup> Shaoyun Chen,<sup>\*a</sup> Weihong Zhang,<sup>c</sup> Fangyan Xie,<sup>c</sup> Jian Chen<sup>c</sup> and Xudong Chen,<sup>b</sup>*

<sup>a</sup>Key Laboratory of Optoelectronic Chemical Materials and Devices of Ministry of Education, Jiangnan University, Wuhan 430056, China.

<sup>b</sup>Key Laboratory for Polymeric Composite and Functional Materials of Ministry of Education, DSAPM Lab, School of Chemistry and Chemical Engineering, Sun Yat-sen University, Guangzhou 510275, China.

<sup>c</sup>Instrumental Analysis and Research Center, Sun Yat-sen University, Guangzhou 510275, China.

\*Corresponding authors: cescsy@163.com (S. Y. Chen); Key Laboratory of Optoelectronic Chemical Materials and Devices of Ministry of Education, Jiangnan University.

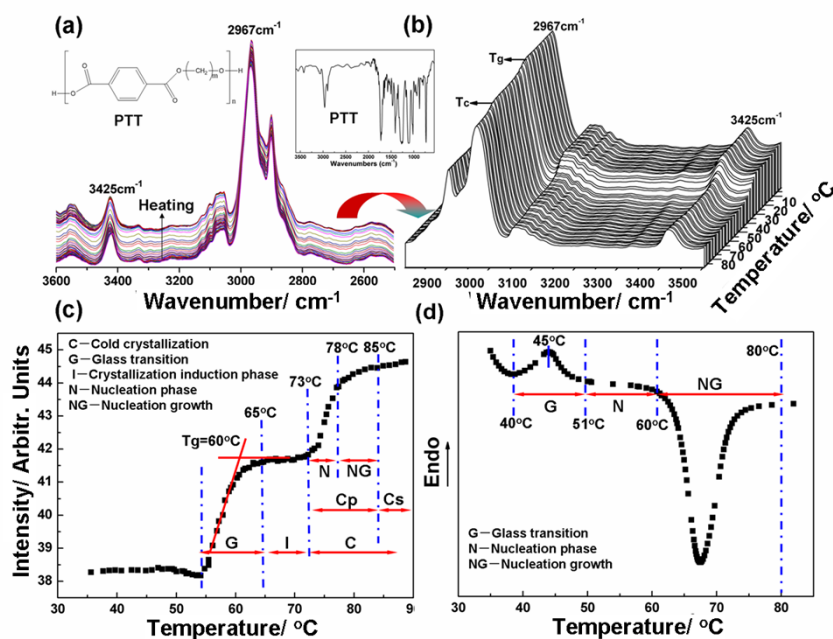

Figure S1 (a) and (b) Typical FTIR spectra of an amorphous PTT film at certain temperatures. (c) FTIR absorbance of an amorphous PTT film at  $2967\text{ cm}^{-1}$  with a function of temperature (the heating rate was  $5\text{ }^{\circ}\text{C}/\text{min}$  in air). Cp and Cs represented primary crystallization and secondary crystallization, respectively. (d) DSC heating versus temperature of an amorphous PTT film collected at a heating rate of  $5\text{ }^{\circ}\text{C}/\text{min}$  in nitrogen).

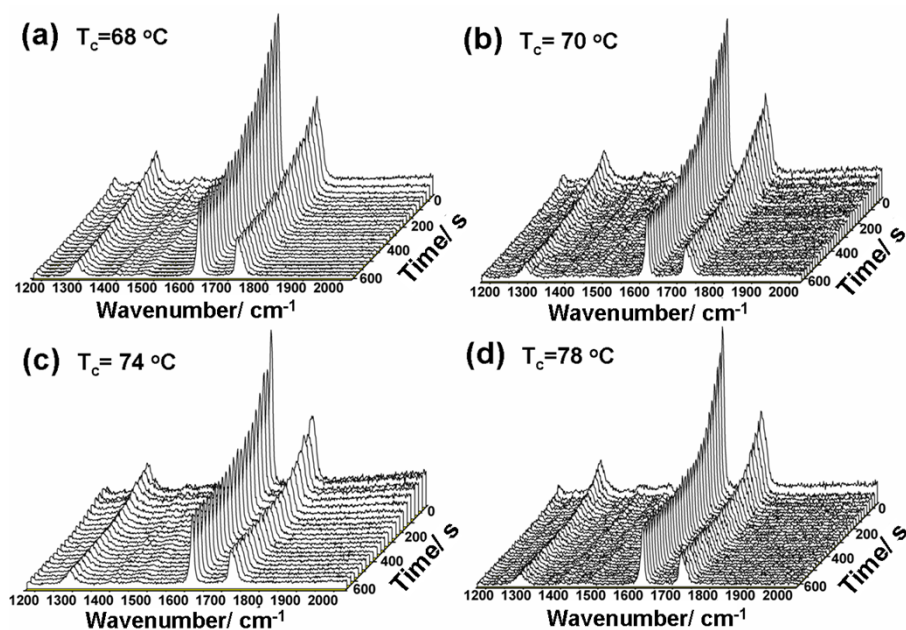

Figure S2 The Raman spectra of an amorphous PTT film at certain isothermal crystallization temperature ( $T_c$ ) (a)  $T_c=68\text{ }^{\circ}\text{C}$ , (b)  $T_c=70\text{ }^{\circ}\text{C}$ , (c)  $T_c=74\text{ }^{\circ}\text{C}$  and (d)  $T_c=78\text{ }^{\circ}\text{C}$ .

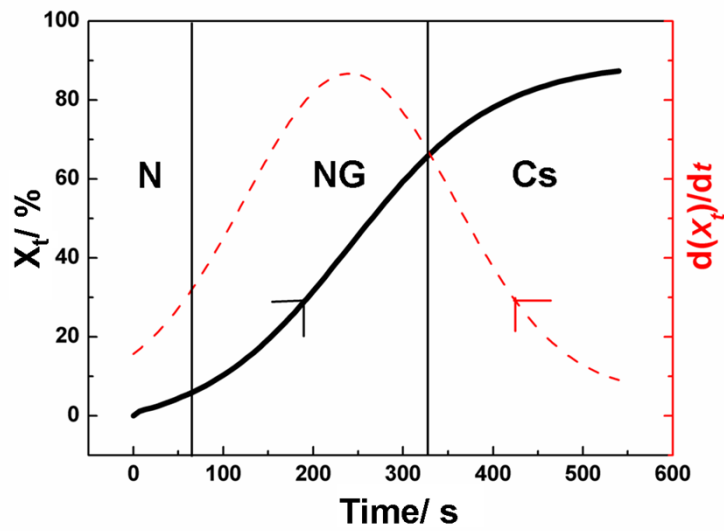

Figure S3 Dependence of relative crystallinity on crystallization time (solid line) and its differential curve (dash line). Crystallization temperature was 68 °C. The dynamic process contained four phases: (N) nucleation phase, (NG) nucleus growth phase and (Cs) secondary crystallization phase.
